# Supplementary material for: Arginine-vasopressin mediates counter-regulatory glucagon release and is diminished in type 1 diabetes
Source: eLife. 2021 Nov 17;10:e72919. doi: 10.7554/eLife.72919 (PMC8654374; doi:10.7554/eLife.72919)
Supplement: Source data 1. [file elife-72919-supp1.xlsx]

## Sheet: figure1B
	mean	Saline	CNO	AVPR1b Antagonist + CNO	GCGR Antagonist + CNO
0	0	0	0	0	0
15	15	0.388889	0.993056	0.270833	0.118056
30	30	-0.298611	1.52778	0.180556	0.0486111
60	60	-0.756944	0.861111	0.215278	-0.5
120	120	-0.875	0.291667	-0.597222	-1.73611

## Sheet: figure1C
	Saline 30min	CNO 30min
mean	24.2109	28.6052
SD	4.77406	3.95534
N	15	18

## Sheet: figure1D
Time	MEAN	SEM	N
0	7.94883	1.57641	5
30	4.12648	1.63976	5
45	3.10233	0.307927	5
60	4.18816	0.828298	5
120	6.04679	1.7107	5

## Sheet: figure1E
	0	30
mean	8.04542	84.6844
SEM	1.47995	10.3761

## Sheet: figure2a
	mean	sem
1	29.0531	4.82902
2	34.3764	2.31657
3	34.2187	3.18783
4	36.5672	2.59143
5	38.7843	3.55502
6	41.8658	3.41002
7	41.7064	3.89821
8	41.3075	4.35277
9	41.7847	7.85121
10	44.0143	7.93463
11	35.6198	3.57764
12	33.6313	3.57805
13	67.5686	25.891
14	64.2105	18.2067
15	75.8345	22.3608
16	112.979	35.4177
17	92.034	33.4156
18	58.3636	11.6889
19	64.7892	14.7444
20	80.7463	33.1015
21	78.4882	28.1941
22	87.1169	34.407
23	102.759	35.4826
24	75.1459	33.2619
25	27.4785	8.47681
26	22.1461	4.43048
27	22.6512	4.36755
28	23.9201	4.68431
29	25.7025	4.8289
30	25.9143	4.95477
31	29.4703	6.24707
32	33.0288	6.08542
33	20.478	4.78519
34	17.9313	3.01701
35	19.5224	4.17141
36	20.9977	4.13645
37	17.008	3.26691

## Sheet: figure2e
	3G	10 pM	100 pM	1000 pM	104pM	20G
Minimum	0.0547	0.1313	0.2135	0.292	0.318	0.016
25% Percentile	0.07123	0.165	0.2557	0.3015	0.3803	0.0199
Median	0.0932	0.2379	0.2842	0.3876	0.5512	0.0325
75% Percentile	0.1134	0.3266	0.6089	0.6895	0.6474	0.04988
Maximum	0.148	0.7261	0.6165	0.9287	0.66	0.063
Mean	0.0949	0.288	0.3791	0.4739	0.5213	0.03512
Std. Deviation	0.03134	0.1895	0.1821	0.262	0.1419	0.01756
Std. Error of Mean	0.009911	0.06699	0.07434	0.1172	0.06345	0.007171
Lower 95% CI of mean	0.07248	0.1295	0.188	0.1486	0.3451	0.01668
Upper 95% CI of mean	0.1173	0.4464	0.5702	0.7992	0.6975	0.05355
Sum	0.949	2.304	2.275	2.37	2.607	0.2107

## Sheet: figure2f
	3G	100 pM	100 pM + SSR
Minimum	0.0477	0.2501	0.05475
25% Percentile	0.0501	0.267	0.06569
Median	0.0669	0.5481	0.1368
75% Percentile	0.1252	0.7082	0.2748
Maximum	0.1434	0.7423	0.2837
Mean	0.08349	0.4997	0.1636
Std. Deviation	0.04079	0.2239	0.1061
Std. Error of Mean	0.01824	0.1001	0.04745
Lower 95% CI of mean	0.03285	0.2217	0.03183
Upper 95% CI of mean	0.1341	0.7777	0.2953
Sum	0.4175	2.499	0.8179

## Sheet: figure2g
	3G	10 pM	100 pM	1000 pM
Minimum	0.006058	0.1393	0.01624	0.2262
25% Percentile	0.06586	0.1647	0.06663	0.2762
Median	0.1125	0.1903	0.229	0.5069
75% Percentile	0.2421	0.2997	0.3427	0.6252
Maximum	0.3255	0.3093	0.9025	0.6592
Mean	0.1391	0.2238	0.2599	0.4619
Std. Deviation	0.1105	0.07264	0.27	0.1814
Std. Error of Mean	0.03682	0.03249	0.09	0.08113
Lower 95% CI of mean	0.05423	0.1336	0.05232	0.2367
Upper 95% CI of mean	0.224	0.314	0.4674	0.6872
Sum	1.252	1.119	2.339	2.31

## Sheet: figure3b
	3G	10	100	1000
Minimum	0	0.14	1.05	1.72
25% Percentile	0.28	0.6275	1.545	1.85
Median	0.6	1.17	1.898	2.13
75% Percentile	1.102	1.55	2.77	2.87
Maximum	2.576	1.7	3.16	3
Mean	0.7796	1.061	2.067	2.267
Std. Deviation	0.692	0.5387	0.7099	0.4874
Std. Error of Mean	0.1678	0.1905	0.251	0.1842
Lower 95% CI of mean	0.4238	0.6109	1.473	1.816
Upper 95% CI of mean	1.135	1.512	2.66	2.718
Sum	13.25	8.49	16.53	15.87

## Sheet: figure3d
	3G	1pM	10 pM	30 pM	100 pM	1 nM	10 nM
Number of values	170	142	183	145	184	151	159
25% Percentile	0	0	0	0.003341	0.000815	0.004114	0.00678
Median	0	0.003086	0.005527	0.006726	0.007063	0.0125	0.02045
75% Percentile	0.00232	0.01241	0.01331	0.0136	0.0167	0.02453	0.0327
Maximum	0.00746	0.02899	0.03455	0.03699	0.03586	0.05723	0.08521
Mean	0.001081	0.00666	0.007898	0.00967	0.01013	0.01585	0.02257
Std. Deviation	0.001863	0.008409	0.009146	0.009737	0.009745	0.01429	0.01972
Std. Error of Mean	0.0001429	0.0007057	0.0006761	0.0008086	0.0007184	0.001163	0.001564
Lower 95% CI of mean	0.0007993	0.005265	0.006564	0.008072	0.008712	0.01356	0.01948
Upper 95% CI of mean	0.001364	0.008055	0.009232	0.01127	0.01155	0.01815	0.02566
Sum	0.1838	0.9458	1.445	1.402	1.864	2.394	3.589

[truncated: 16 more sheets: figure3e, figure3h, figure3j, figure4b, figure4d, figure4i, figure5g, figure5h, figure5k, figure6b, figure6c, figure6e, figure6h, figure7b, figure7c, figure7d]
